# Supplementary material for: A Trial of Prazosin for Combat Trauma PTSD With Nightmares in Active-Duty Soldiers Returned From Iraq and Afghanistan
Source: Atypon-hosted journal article supplement (doi:10.1176/appi.ajp.2013.12081133), 2013-07-12
Supplement: 1003_ds001.pdf [file 1003_ds001.pdf]

**FIGURE S1. Participant Flow for Trial of Prazosin for Combat Trauma-Related Posttraumatic Stress Disorder With Nightmares in Active-Duty Soldiers**

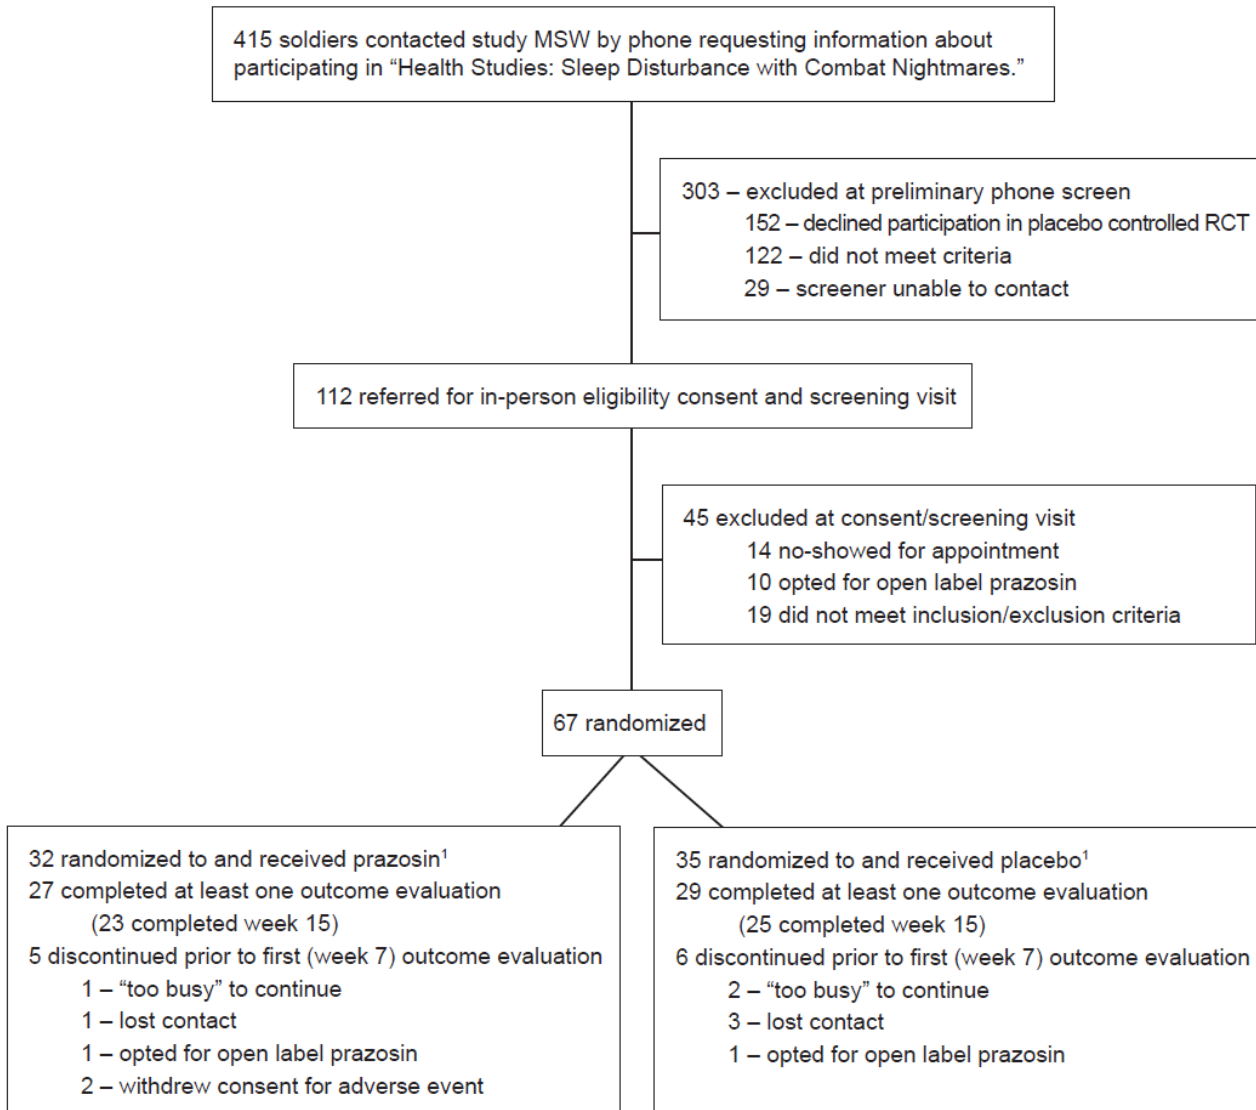

<sup>1</sup> Ten of 32 (31%) in the prazosin group were on an antidepressant; 14 of 36 (39%) in the placebo group were on an antidepressant.
